# Supplementary material for: Physiological response of a golden tide alga ( Sargassum muticum ) to the interaction of ocean acidification and phosphorus enrichment
Source: Copernicus journal article supplement (doi:10.5194/bg-2016-415), 2016-10-17
Supplement: Supplementary file [file bg-2016-415-AC3-supplement.pdf]

# **Interactive comment on “Physiological response of a golden tide alga (*Sargassum muticum*) to the interaction of ocean acidification and phosphorus enrichment” by Zhiguang Xu et al.**

D. Campbell (Referee)

dcampbell@mta.ca

Received and published: 31 October 2016

The authors grew an invasive *Sargassum* species under an ecophysiological matrix of  $p\text{CO}_2$  and [phosphate]. They analyzed the growth rate, photosynthetic rates, nitrate uptake and reduction rates and composition of the algae. They show interactive effects of  $p\text{CO}_2$  and [phosphate].

The study is well designed and potentially interesting. The current discussion spends words on entirely speculative interpretations that might well be true, but which are not directly supported by the data presented. On the other hand, intriguing ratios and discrepancies in the presented results are not discussed. For example, how can algal nitrate uptake rates exceed measured nitrate reduction rates? Does the tissue store  $\text{NO}_3^-$  differentially depending upon conditions? Are there variable rates of denitrification in the media?

[Response: We appreciate these comments. We believe our manuscript has been improved by answering the reviewer's queries. Please see the following response for details.](#)

What happens to the environmental effects upon photosynthesis if it is normalized to chlorophyll rather than fresh weight?

[Response: The reviewer raised a valuable point. We have normalized photosynthesis rate to chl \*a\*. The net photosynthetic rates under different treatments were  \$135.4 \pm 27.0\$  \(LCLP\),  \$142.2 \pm 6.5\$  \(LCHP\),  \$161.1 \pm 4.4\$  \(HCLP\), and  \$193.0 \pm 7.6\$  \(HCHP\)  \$\mu\text{mol O}\_2 \text{ mg}^{-1} \text{ chl } a \text{ h}^{-1}\$  respectively. The higher  \$p\text{CO}\_2\$  increased the net photosynthetic rate by 35% at HP and the higher P increased it by 20% at HC.](#)

I offer some suggestions below for the authors. best regards, Doug Campbell

Abstract: 'the development of golden tides...' (not 'evolvment')

Response: Corrected.

39.31% etc. over precision. It is not possible to report such values to 1 part per 10,000 but that is what is implied by 39.31%

Response: It has been changed to 39%.

Introduction: '...it originates from Japan...' (not 'it origins...')

Response: Corrected.

Materials & Methods line 155: units for total alkalinity?

Response: We presume the reviewer meant the unit for salinity here. The unit for salinity has been developing. The Practical Salinity Scale (PSS) was defined in 1978 and later promulgated by the UNESCO/ICES/SCOR/IAPSO Joint Panel on Oceanographic Tables and Standards in Sidney, BC, Canada, 1-5 September 1980. Because it makes no sense to say the salinity is, for example, 35 PSS, the term Practical Salinity Unit (PSU) was introduced. However, the use of PSU is discouraged because salinity is by definition a dimensionless parameter. For now, most oceanographers follow the recommendation of the Scientific Committee for Oceanic Research (SCOR) that salinity be represented by a unitless number, as it's a unitless ratio and its measurement is now based on conductivity instead of the long time gone determination of evaporated mass.

Line 195: Decrease in  $\text{NO}_3^-$  in the media could result from microbial denitrification? A cross check would be whether nitrate reductase activity matched 1:1 with decrease in  $\text{NO}_3^-$  in the media?

Response: The reviewer raised a point worthy of discussion. We agree that nitrate reductase activity should match 1:1 with decrease in  $\text{NO}_3^-$  in the media, in theory. However, the uncoupling between them is not uncommon and could be found in both microalgae (Collos 1982; Blasco et al., 1984) and macroalgae (Gordillo et al., 2001; Zou, 2005). One possible cause that leads to the  $\text{NO}_3^-$  uptake from the media exceeding  $\text{NO}_3^-$  reductase activity in the present study may be the intercellular  $\text{NO}_3^-$

storage (Collos 1982; Viaroli et al., 1996). It has been reported that the  $\text{NO}_3^-$  reductase activity (NRA) peak was 11-fold less than the  $\text{NO}_3^-$  uptake rate in *Ulva* sp. , suggesting the reduction of  $\text{NO}_3^-$  reductase to nitrite  $\text{NO}_2^-$  by nitrate reductase was the rate-limiting step in  $\text{NO}_3^-$  assimilation (Lartigue and Sherman, 2005). Another reason might be the underestimation of NRA as the  $\text{NO}_2^-$  release may be limited not only by NRA, but also by the diffusion rates of  $\text{NO}_3^-$  into the cells and  $\text{NO}_2^-$  out of the cells in the assay used in the present study (Lartigue and Sherman, 2002). As for the microbial denitrification, we presume there is less possibility that the additional decrease of  $\text{NO}_3^-$  was caused by it. As far as we know, denitrification only takes place in anoxic environments while our cultures were aerated by ambient or  $\text{CO}_2$  enriched air. Apparently, we do not have evidence to support these specific interpretations. To minimize the content of speculation, we would like to add one sentence to the text “It is worth noting that the nitrate uptake rates were commonly higher than the corresponding reduction rates of  $\text{NO}_3^-$  to nitrite  $\text{NO}_2^-$  by nitrate reductase in the present study, which might be due to the intercellular nitrate storage (Collos, 1982; Lartigue and Sherman, 2005) and the underestimation of RNA measured by the in situ assay (Lartigue and Sherman, 2002).” at lines 416-420.

- Blasco, D., MacIsaac, J. J., Packard, T. T., and Dugdale, R. C.: Relationship between nitrate reductase and nitrate uptake in phytoplankton in the Peru upwelling region, *Limnol. Oceanogr.*, 29, 275-286, 1984.
- Collos Y.: Transient situations in nitrate assimilation by marine diatoms. III. Short-term uncoupling of nitrate uptake and reduction, *J. Exp. Mar. Bio. Ecol.*, 62, 285-295, 1982.
- Gordillo, F. J. L., Niell, F. X., and Figueroa, F. L.: Non-photosynthetic enhancement of growth by high  $\text{CO}_2$  level in the nitrophilic seaweed *Ulva rigida* C. Agardh (Chlorophyta), *Planta*, 213, 64-70, 2001.
- Lartigue, J., and Sherman, T. D.: Field assays for measuring nitrate reductase activity in *Enteromorpha* sp. (Chlorophyceae), *Ulva* sp. (Chlorophyceae), and *Gelidium* sp. (Rhodophyceae), *J. Phycol.*, 38, 971-982, 2002.
- Lartigue, J., and Sherman, T. D.: Response of *Enteromorpha* sp. (Chlorophyceae) to a nitrate pulse: nitrate uptake, inorganic nitrogen storage and nitrate reductase activity, *Mar. Ecol. Prog. Ser.*, 292, 147-157, 2005.
- Viaroli, P., Naldi, M., Bondavalli, C. and Bencivelli, S. Growth of the seaweed *Ulva rigida* C. Agardh in relation to biomass densities, internal nutrient pools and external nutrient supply in the Sacca di Goro lagoon (Northern Italy), *Hydrobiologia*, 329, 93–103, 1996.
- Zou, D.: Effects of elevated atmospheric  $\text{CO}_2$  on growth, photosynthesis and nitrogen metabolism in the economic brown seaweed, *Hizikia fusiforme* (Sargassaceae,

Phaeophyta), *Aquaculture*, 250, 726-735, 2005.

Fig. 3: There is an inhibition response in HCLP that is not apparent in other treatments.

Response: It appears that the last two points are lower than the two points before them but there are no statistical differences between these four points.

Fig. 4: Would a renormalization of photosynthetic rates (fig. 2) to chlorophyll content (fig. 4) eliminate some of the differences among treatments? I think maybe yes. Then some of the photosynthetic data can be explained by nutrient effects on content of photosynthetic units.

Response: The reviewer raised a valuable point. We have normalized photosynthesis rate to chl *a*. The net photosynthetic rates under different treatments were  $135.4 \pm 27.0$  (LCLP),  $142.2 \pm 6.5$  (LCHP),  $161.1 \pm 4.4$  (HCLP) and  $193.0 \pm 7.6$  (HCHP)  $\mu\text{mol O}_2 \text{ mg}^{-1} \text{ chl } a \text{ h}^{-1}$  respectively. The higher  $p\text{CO}_2$  increased the net photosynthetic rate by 35% at HP and the higher P increased it by 20% at HC. Compared to the results normalized to fresh weight, it does eliminate the differences at LC or LP. We would say this renormalization could partially explain the effects of  $p\text{CO}_2$  and P on photosynthetic rate. Meanwhile, to the best of our knowledge, the photosynthesis rate of macroalgae in most studies is normalized to fresh weight/dry weight. We hope we can keep the current results to compare our study with others'.

Fig. 5, Fig 6 There is a discrepancy.  $\text{NO}_3^-$  uptake from the media cannot exceed  $\text{NO}_3^-$  reductase rates, unless the tissue is storing  $\text{NO}_3^-$ .

Response: Yes. We think it is mainly because of the intercellular nitrate storage as explained in the above response.

Fig 2 vs. Fig 8 dark respiration =  $\sim 1/2$  of photosynthetic rates?

Response: We realize that this ratio may be a little higher, particularly compared to microalgae. However, it might not be surprising for macroalgae. For instance, the ratio of respiration to photosynthesis varies between 0.14 and 0.54 in *Gracilaria lemaneiformis* (Zou and Gao, 2013), around 0.2–0.7 in *Hizikia fusiform* (Zou et al., 2011) and it could even be close to 1 in *Gracilaria tikvahiae* (Lapointe and Tenore, 1984), depending on different culture conditions.

Lapointe, B. E., Tenore, K. R.: Dawes C J. Interactions between light and temperature on the physiological ecology of *Gracilaria tikvahiae* (Gigartinales: Rhodophyta). Mar. Biol., 80, 161-170, 1984.

Zou, D., Gao, K.: Thermal acclimation of respiration and photosynthesis in the marine macroalga *Gracilaria lemaneiformis* (Gracilariales, Rhodophyta), J. Phycol., 49, 61-68, 2013.

Zou D, Gao K, Luo H: Short - and long - term effects of elevated CO<sub>2</sub> on photosynthesis and respiration in the marine macroalga *Hizikia fusiformis* (Sargassaceae, Phaeophyta) grown at low and high n supplies, J. Phycol., 47, 87-97, 2011.

Results Lines 237-241 Over precision in reporting of results to 1 part in 10,000. This is a problem throughout.

Response: It has been revised to 1 part in 100 throughout the text.

Discussion Lines 428 to 440 are entirely speculative. They might be true, but there is no evidence supporting these specific interpretations, in this paper.

Response: We agree with the reviewer. The length of speculation needs to be reduced, although it can supply a direction for future research. It has been shortened to seven lines and it reads now “The increased soluble protein and decreased NRA at the condition of higher  $p\text{CO}_2$  and higher P suggest some  $\text{H}^+$  transport-related protein, such as plasma membrane  $\text{H}^+$ -ATPase, might be synthesized to counteract the acid–base perturbation caused by increased  $p\text{CO}_2$  and  $\text{H}^+$ . The additional production of  $\text{H}^+$  transport-related protein like plasma membrane  $\text{H}^+$ -ATPase could competitively decrease the synthesis of nitrate reductase. This hypothesis needs further experimental evidence to stand even though it could explain the results in the present study.” at lines 431-440.
